# Supplementary material for: Stabilization and solidification of brine water containing selenium, chromium, copper, and mercury utilizing a microwave enabled sol–gel process
Source: Royal Society of Chemistry journal article supplement (doi:10.1039/d1ew00081k), 2021-01-01
Supplement: d1ew00081k1.pdf [file d1ew00081k1.pdf]

# Stabilization and solidification of brine water containing selenium, chromium, copper, and mercury utilizing microwave enabled sol-gel process

Alex Kearns<sup>a</sup>, Meenakshi Bansal<sup>b</sup>, Theodore Kalbfleisch<sup>a</sup>, Aaron Keller<sup>b</sup>, Kirk Ellison<sup>c</sup>, Rajat Chauhan<sup>d</sup>, Mahyar Ghorbanian<sup>a & e\*</sup> and Gautam Gupta<sup>a\*</sup>

<sup>a</sup> *Department of Chemical Engineering, University of Louisville, Louisville, KY 40292, USA*

<sup>b</sup> *Chemistry Department, Thomas More University, Crestview Hills, KY 41017, USA*

<sup>c</sup> *Electric Power Research Institute, 1300 W. WT Harris Blvd., Charlotte, NC 28262, USA*

<sup>d</sup> *Department of Bioengineering, University of Louisville, Louisville, KY 40292, USA*

<sup>e</sup> *Louisville Gas & Electric and Kentucky Utilities Energy (LG&E and KU Energy), 820 W. Broadway, Louisville, KY, 40202, USA*

\* Corresponding author. (Gautam Gupta), *Department of Chemical Engineering, University of Louisville, Louisville, KY 40292, USA*

E-mail address: [gautam.gupta@louisville.edu](mailto:gautam.gupta@louisville.edu)

\* Corresponding author. (Mahyar Ghorbanian), *Department of Chemical Engineering, University of Louisville, Louisville, KY, 40292, USA. Louisville Gas & Electric and Kentucky Utilities Energy (LG&E and KU Energy), 820 W. Broadway, Louisville, KY, 40202, USA.*

Email address: [m.ghorbanian@louisville.edu](mailto:m.ghorbanian@louisville.edu); [Mahyar.ghornanian@lge-ku.com](mailto:Mahyar.ghornanian@lge-ku.com)

The following supporting information appendix consists of six pages, including calculations, two figures and four tables.

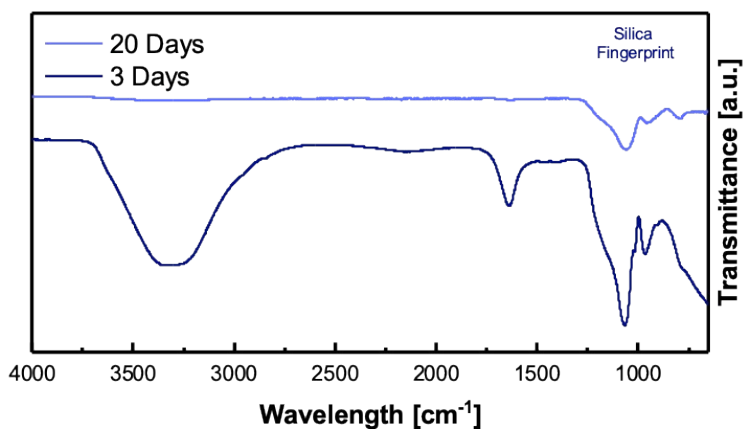

**Supplementary Figure S1. Condensation Reaction.** FT-IR Spectra of samples at 3 days (gels) and 20 days (glass).

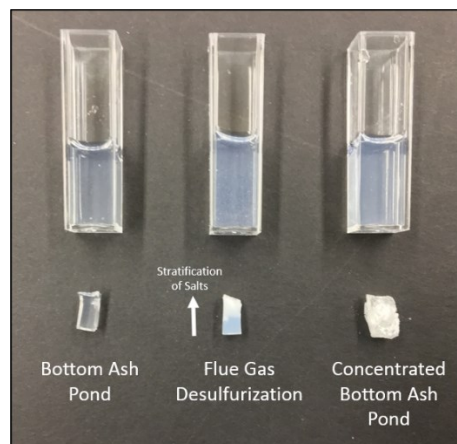

**Supplementary Figure S2.** Gelation and encapsulation of three brine waters (top three) immediately after gelation and (bottom three) after 20 days of drying. The volumes of sample in the vials shown are 2 mL per vial.

**Supplementary Table S1:** Structural Assignments of Raman Bands during TMOS Hydrolysis

| Intermediate                                         | Raman Shift (cm <sup>-1</sup> ) |
|------------------------------------------------------|---------------------------------|
| Si(OCH <sub>3</sub> ) <sub>4</sub>                   | 646                             |
| Si(OCH <sub>3</sub> ) <sub>3</sub> (OH)              | 673                             |
| Si(OCH <sub>3</sub> ) <sub>2</sub> (OH) <sub>2</sub> | 697                             |
| Si(OCH <sub>3</sub> )(OH) <sub>3</sub>               | 725                             |
| Si(OH) <sub>4</sub>                                  | 750                             |

**Supplementary Table S2:** Structural Assignments of  
FTIR Peaks in TMOS Condensation

| Peak Assignment             | Band Position (cm <sup>-1</sup> ) |
|-----------------------------|-----------------------------------|
| H-O-H ( $\nu_s, \nu_{as}$ ) | 3300                              |
| H-O-H ( $\delta$ )          | 1638                              |
| Si-O-Si ( $\nu_{as}$ )      | 1080                              |
| Si-O-H ( $\nu_s$ )          | 940                               |
| Si-O-Si ( $\nu_s$ )         | 750                               |

**Supplementary Table S3:** Ratios of Si-O-Si and Si-O-H bands  
in Encapsulated Solids

|      | Si-O-Si (1080 cm <sup>-1</sup> )<br>Transmittance [a.u.] | Si-O-H (940 cm <sup>-1</sup> )<br>Transmittance [a.u.] | Peak Ratio |
|------|----------------------------------------------------------|--------------------------------------------------------|------------|
| CBAP | 42.41                                                    | 24.12                                                  | 1.76       |
| BAP  | 13.35                                                    | 8.90                                                   | 2.06       |
| FGD  | 18.52                                                    | 10.81                                                  | 1.71       |
| DI   | 11.25                                                    | 5.66                                                   | 1.99       |

### Calculations for TMOS and Ion concentration in our samples:

1 ml of 40% v/v TMOS solution is combined 1ml wastewater sample to make the gel

40% v/v of 1 ml TMOS solution = 0.00271 moles (Density of TMOS=1.03 g/ml and molar mass = 152 g/mol)

So, number of TMOS molecules = .00271 moles x  $6.023 \times 10^{23}$  =  $1.63 \times 10^{21}$  TMOS molecules.

Therefore there should be  $1.63 \times 10^{21}$  sites. (assuming 1 per molecule)

5 ppm Cu =  $5 \times 10^{-6}$  g/ml

$$\frac{(5 \times 10^{-6} \text{ g/ml} \times 6.02 \times 10^{23} \text{ Cu ions/mol})}{63.5 \text{ g/mol}} = 4.7 \times 10^{16} \text{ Cu Ions}$$

Therefore, the ratio of available sites to  $3 \times 10^4$  divided by 2, which is  $1.5 \times 10^4$ , which is enough to capture 5 ppm or higher. However, this is not observed as we obtained 50% leaching at 5000 ppm. So we can not assume 1 site per TMOS molecule, and it should be around 10% or less of the available sites per molecule. That will put us in the ballpark of 1500 ppm, which is a reasonable number and is subsequently higher than what is observed in any of the waste water samples.

(a) In presence of divalent cation and their respective calculations:

Total ion concentration in 1 ml Flue Gas Desulfurization (FGD) wastewater sample:

8700 ppm Ca =  $8 \times 10^{-3}$  g/ml

$$(8.7 \times 10^{-3} \text{ g/ml} \times 6.02 \times 10^{23} \text{ Ca ions/mol}) = 1.3 \times 10^{20} \text{ Ca Ions}$$

---

$$40 \text{ g/mol}$$

$$2000 \text{ ppm Mg} = 2 \times 10^{-3} \text{ g/ml}$$

$$(2 \times 10^{-3} \text{ g/ml} \times 6.02 \times 10^{23} \text{ Mg ions/mol}) = 5.0 \times 10^{19} \text{ Mg Ions}$$

---

$$24 \text{ g/mol}$$

The ratio of number of sites available to number of ions to capture is still 5:1 ( again assuming 1 site per TMOS available, with 2 sites required per divalent cation).

Also, there is high concentration of chloride (9000 ppm) present in the wastewater. Ion pairing will occur between the  $\text{Ca}^{2+}$  /  $\text{Mg}^{2+}$  ions and the  $\text{Cl}^-$  ions which will favor the heavy metal binding by making more binding sites available in the gel.
